# Supplementary material for: α-Mangostin Suppresses the Viability and Epithelial-Mesenchymal Transition of Pancreatic Cancer Cells by Downregulating the PI3K/Akt Pathway
Source: Hindawi journal article supplement (doi:10.1155/2014/546353), 2014-01-01
Supplement: f1 [file 546353.f1.pdf]

**Table S1. PCR Primer Sequences**

| genes          | Primer | Sequence                       |
|----------------|--------|--------------------------------|
| Human          |        |                                |
| $\beta$ -actin | P1:    | 5'- AGCGAGCATCCCCCAAAGTT -3'   |
|                | P2:    | 5'- GGGCACGAAGGCTCATCATT -3'   |
| MMP-2          | P1:    | 5'- GATGATGCCTTTGCTCGTGC -3'   |
|                | P2:    | 5'- CAAAGGGGTATCCATCGCCA -3'   |
| MMP-9          | P1:    | 5'- AGGACGGCAATGCTGATG -3'     |
|                | P2:    | 5'- TCGTAGTTGGCGGTCGTG -3'     |
| E-cadherin     | P1:    | 5'- ATTCTGATTCTGCTGCTCTTG -3'  |
|                | P2:    | 5'- AGTCCTGGTCCTCTTCTCC -3'    |
| Vimentin       | P1:    | 5'- AATGACCGCTTCGCCAAC -3'     |
|                | P2:    | 5'- CCGCATCTCCTCCTCGTAG -3'    |
| N-cadherin     | P1:    | 5'- TGTTTGACTATGAAGGCAGTGG -3' |
|                | P2:    | 5'- TCAGTCATCACCTCCACCAT -3'   |
